# Supplementary material for: Analysis of microbial compositions: a review of normalization and differential abundance analysis
Source: PubMed Central journal article supplement (PMC7710733; doi:10.1038/s41522-020-00160-w), 2020-12-02
Supplement: 41522_2020_160_MOESM1_ESM.pdf [file 41522_2020_160_MOESM1_ESM.pdf]

# Supplementary Information

**Analysis of microbial compositions: A review of normalization and differential abundance analysis**

Lin et al.

## Supplementary Notes

### Simulation settings

#### Fig. 3

- (a) Nominal level = 0.05
- (b) Number of simulations = 1
- (c) Sample size:  $n_1 = n_2 = n_3 = 30$
- (d) Number of taxa:  $m = 200$
- (e) Proportion of differentially abundant taxa = 25%
- (f) Proportion of structure zeros = 0% out of non-differentially abundant taxa
- (g) Absolute abundance in the ecosystem:  $\log A_{ij} = b_0 + b_i^T x_j + e_i$ .
  - (i)  $b_0 = \log 50$  represents low abundant taxa,  $b_0 = \log 200$  represents medium abundant taxa, and  $b_0 = \log 10,000$  represents high abundant taxa. The proportions of low, median, and high abundant taxa are set to be 60%, 30%, 10%
  - (ii)  $x_j = (x_{j1}, \dots, x_{jp})^T$  are covariates for the  $j^{\text{th}}$  sample;  $b_i = (b_{i1}, \dots, b_{ip})^T$  are the corresponding coefficients for  $x_j$ .  $b_i$  are set to follow  $U(0.1, 1) \cup U(1, 10)$  for differentially abundant taxa
  - (iii)  $e_i \sim N(0, \frac{1}{\exp(b_0)})$
- (h) Observed abundance from a sample:
  - (i) Library sizes across samples:  $O_{.j} = p_j \max(A_{.j})$ , where  $p_j \sim \frac{1}{U(5,10)}$
  - (ii)  $O_{ij} \sim \text{BIN}(O_{.j}, \gamma_{ij} = \frac{A_{ij}}{A_{.j}})$

#### Fig. 4

Simulation settings are the same as Fig. 3 except that:

- (b) Number of simulations = 100
- (c) Sample size:  $n_1 = n_2 = 30$
- (e) Proportion of differentially abundant taxa = 5%, 15%, 25%
- (f) Proportion of structure zeros = 20% out of non-differentially abundant taxa
- (h) Observed abundance from a sample:
  - (i) Library sizes across samples:  $O_{.j} = p_j \max(A_{.j})$ , where  $p_j \sim \frac{1}{U(10,50) \cup U(100,500)}$
  - (ii)  $O_{ij} \sim \text{BIN}(O_{.j}, \gamma_{ij} = \frac{A_{ij}}{A_{.j}})$
